# Supplementary material for: Two mouse models carrying truncating mutations in Magel2 show distinct phenotypes
Source: PubMed Central journal article supplement (PMC7430741; doi:10.1371/journal.pone.0237814), 2020-08-17
Supplement: pone.0237814.s008.pdf [file pone.0237814.s008.pdf]

Fig 3A raw image

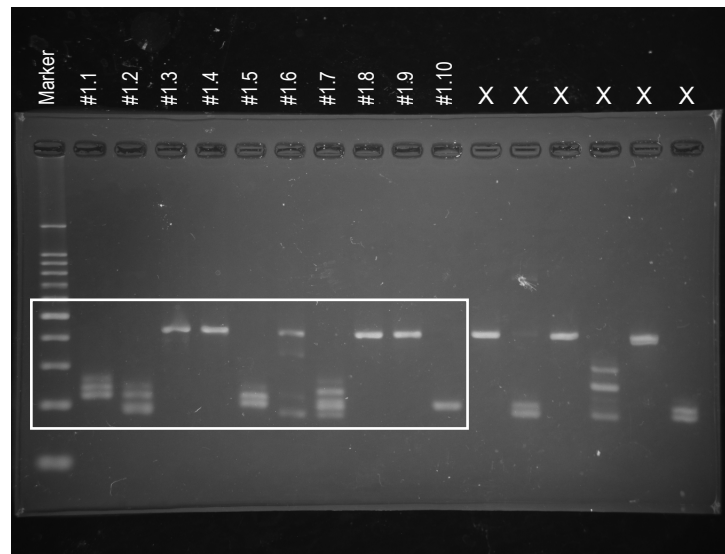

Fig 4A raw images

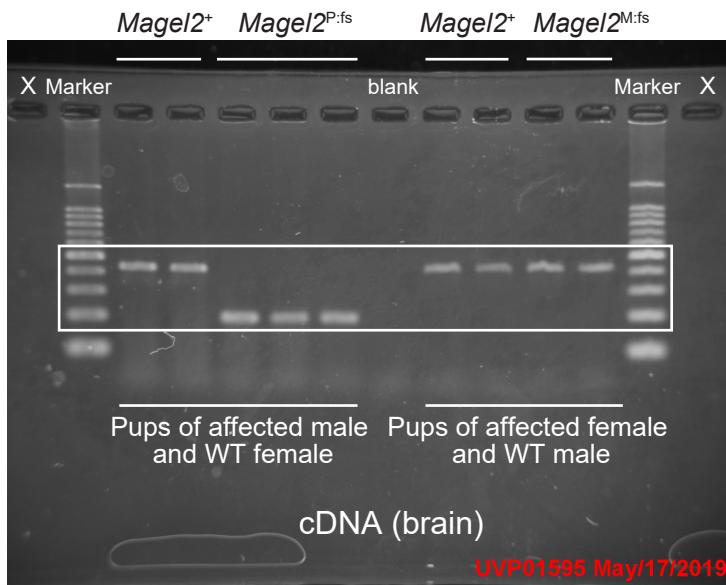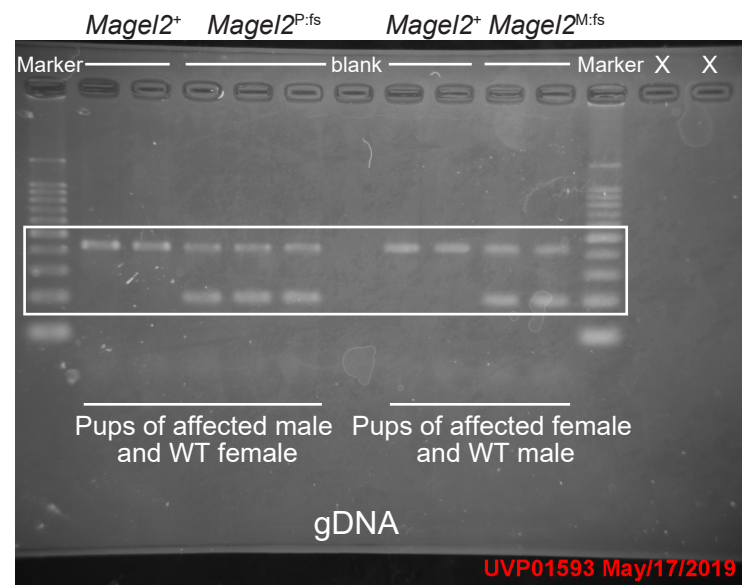

S6 fig raw image

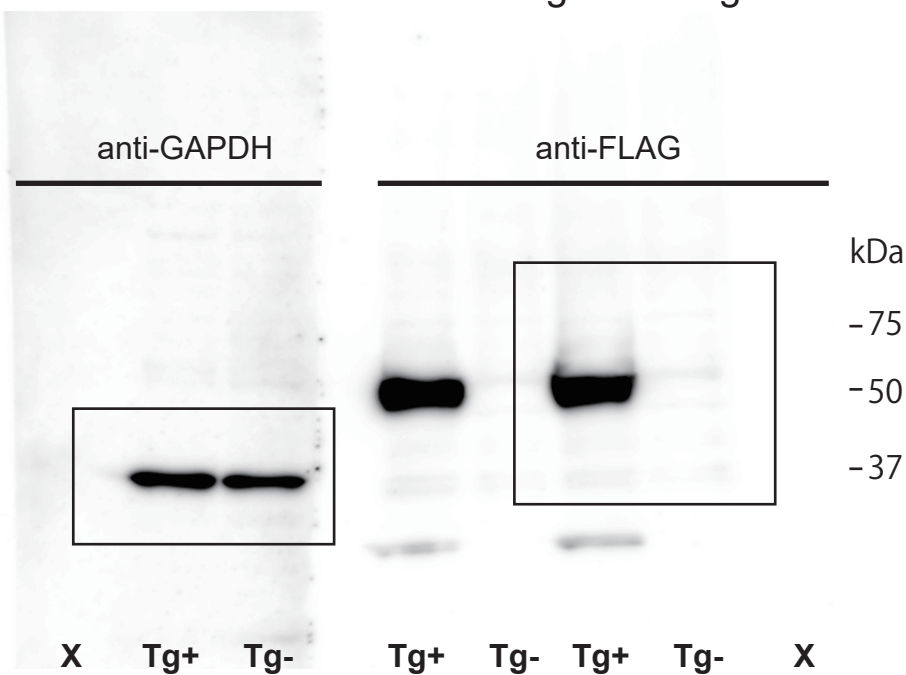

Tg+: HEK293 cell (transfected with pCAGGS1-Magel2-FLAG)  
Tg- : HEK293 cell (untreated)
